# Supplementary material for: Indole and 2,4-Thiazolidinedione conjugates as potential anticancer modulators
Source: PeerJ. 2018 Aug 8;6:e5386. doi: 10.7717/peerj.5386 (PMC6087425; doi:10.7717/peerj.5386)
Supplement: Data S1 [file peerj-06-5386-s002.xlsx]

## Sheet: IC50
PC3 cell line	24h	ctrl	AC1	AC2	AC3	AC4	AC5	AC6	AC7	AC8	AC9	AC10	AC11	AC12	AC13	AC14	AC15	AC16	AC17	AC18	AC19	AC20	AC21	AC22	AC23	AC24	AC25	AC26
	0 µM	1	1	1	1	1	1	1	1	1	1	1	1	1	1	1	1	1	1	1	1	1	1	1	1	1	1	1
	3,33 µM	0.969751	1.07232	0.927466	1.0905	1.01623	1.01277	1.10997	1.03504	0.903553	1.20127	1.11801	0.935714	1.04369	1.17247	0.988024	0.953453	1.0098	0.963722	1.00447	0.942848	0.946712	1.01216	1.02381	1.04452	0.993594	1.0264	1.04202
	5 µM	0.654804	1.17175	0.853267	0.616747	0.878896	0.778723	0.825086	0.845255	0.861929	0.9271	1.10683	0.683143	0.651214	0.920066	0.830838	1.0036	0.829739	0.85142	0.903017	0.894513	0.997732	0.773556	0.992063	0.852146	0.935587	0.868977	1.02084
	10 µM	0.647687	0.629379	0.751032	0.838969	0.89513	0.737589	0.871134	0.797372	0.773266	0.900158	0.807453	0.725714	0.760922	0.791045	0.73982	0.870571	0.897059	0.830915	0.867486	0.83083	1.06009	0.81307	0.945397	0.871542	1.03701	0.911881	0.958655		IC50 mean values
	33,3 µM	0.713946	0.97344	0.696726	0.773794	0.811635	0.9447	0.869745	0.698821	1.03268	0.938095	0.801354	0.717408	0.674592	0.783355	0.678707	0.843421	0.657831	0.849958	0.986284	0.766841	0.991776	0.772375	0.901999	0.788506	0.984277	0.929263	0.921377
	48h
	0 µM	1.13879	1.09266	1.39049	1.07568	1.10714	1.06809	1.08247	1.03942	1.18105	1.18384	1.12733	1.07714	1.06917	1.23881	1.04641	1.08408	0.98366	0.973186	1.11732	1.18223	0.74263	1.0304	0.993651	0.968203	1.14769	1.10891	1.02185
	3,33 µM	0.733096	1.17288	1.43377	1.1256	1.18344	1.1078	1.12371	1.11241	1.1489	1.29002	1.02484	1.06429	1.16383	1.22056	1.08982	1.03604	1.15523	1.06467	1.04916	1.28837	0.702721	1.0304	1.00476	1.06836	1.14769	1.07096	1.13277
	5 µM	2.1853	1.08985	1.56051	1.31381	1.38342	1.17627	1.11931	1.40955	1.38889	1.40723	1.36098	1.09728	0.783259	1.31453	0.851687	1.11442	1.48364	0.428136	0.396449	0.965785	0.602253	1.19308	1.11194	0.855558	0.927977	1.19749	1.05755
	10 µM	1.70164	0.990091	1.16329	1.19126	0.926622	0.823605	1.00876	0.965183	0.896067	1.36877	1.78468	0.945183	1.10377	1.26242	0.922828	0.828999	1.181	1.40906	0.790799	0.811549	0.627036	1.08471	0.844092	1.20247	0.96047	1.13611	0.965265
	33,3 µM	1.76673	1.04184	0.399842	1.55815	1.71222	1.03698	1.2627	0.952551	1.21924	1.11861	1.10634	1.02938	1.02917	1.18192	0.788549	0.813534	0.996766	0.911084	0.542941	0.840821	0.592059	0.832465	0.845521	0.864947	0.999964	0.992852	0.952229
	72h
	0 µM	1.22776	1.22486	2.80094	1.04509	1.06006	1.25532	1.85052	1.69489	2.13029	1.2504	2.00621	1.02143	0.911408	1.65506	0.946108	1.01952	1.75752	1.13091	0.656983	1.28184	0.979592	0.966565	1.08571	0.893482	2.18327	1.13531	1.08235
	3,33 µM	1.18327	1.15367	2.38666	1.10145	1.12175	1.2539	1.97423	1.00292	2.10491	1.2599	1.71304	1.05857	0.853155	1.5141	0.982036	1.17117	1.72157	1.0836	0.618324	1.28347	0.952381	0.974164	1.02857	0.928458	2.16192	1.08251	1.1563
	5 µM	3.62297	1.22143	2.58476	2.79443	2.54677	1.69005	2.66962	1.7068	1.92285	1.21368	2.00587	1.09473	0.751794	1.71977	1.18127	1.15716	2.28672	1.04151	0.449076	1.27188	0.484111	0.903523	0.408095	0.977932	2.4475	1.0578	1.39594
	10 µM	3.3814	1.50173	2.03143	2.45269	2.25374	1.40708	1.99157	1.73007	1.87138	1.01589	1.73199	0.896326	0.738202	1.23167	0.595579	1.4506	1.88962	0.757365	0.446425	1.24029	0.460107	0.555179	0.482616	0.964533	3.3413	0.655986	0.687807
	33,3 µM	6.52779	1.26642	1.7881	2.23985	2.02435	1.14756	2.69157	1.33757	1.85596	1.24255	1.64577	0.772574	0.376921	0.806839	0.360178	0.613744	1.74522	0.484867	0.465214	1.17933	0.458895	0.357895	0.445854	0.452971	1.99018	0.408721	0.424364
MCF7 cell line	24h	ctrl	AC1	AC2	AC3	AC4	AC5	AC6	AC7	AC8	AC9	AC10	AC11	AC12	AC13	AC14	AC15	AC16	AC17	AC18	AC19	AC20	AC21	AC22	AC23	AC24	AC25	AC26
	0 µM	1	1	1	1	1	1	1	1	1	1	1	1	1	1	1	1	1	1	1	1	1	1	1	1	1	1	1
	3,33 µM	0.971348	0.944727	0.927466	1.11636	0.994623	0.569872	1.04234	0.895682	0.847582	1.03933	0.889934	0.976514	1.02237	0.960459	0.778413	1.18379	0.96945	0.906591	1.00184	0.952841	1.05779	0.906265	0.817505	1.11463	1.06042	0.997444	0.903162
	5 µM	0.805731	1.0286	0.853267	0.964451	0.579472	0.727155	0.889081	0.960817	0.861165	0.961714	0.880507	0.972762	1.01574	1.02196	0.747033	1.16516	1	0.91445	0.821049	0.859314	1.21437	0.817584	0.857007	1.10713	1.10762	0.990631	0.890818
	10 µM	0.819988	0.903067	0.751032	0.86682	0.646401	0.854852	1.04858	0.919077	0.716739	1.22008	0.864312	1.50097	1.11108	0.861277	1.07005	1.07452	1.06564	1.03507	0.723714	1.47243	1.0376	0.766945	0.93511	1.01419	0.991335	0.899391	1.04
	33,3 µM	0.872261	0.666592	0.696726	1.23884	0.752212	0.460459	0.784703	0.996644	0.734839	1.1876	1.14061	1.22966	0.861519	1.13806	0.691318	1.10289	0.803828	0.770307	0.908635	1.0693	0.87613	1.11641	0.691793	0.927109	0.880313	0.977488	0.871109
	48h
	0 µM	1.62412	1.11809	1.39049	1.1444	0.943948	1.0358	1.10167	0.855794	1.30756	2.20274	1.14627	1.17839	1.16443	1.23933	1.46227	1.53702	1.42668	1.25836	1.21337	1.40505	1.04834	1.31788	1.08575	1.08829	1.4923	1.12686	1.01695
	3,33 µM	1.30072	1.70248	1.43377	1.25578	1.09342	0.943231	0.924273	0.962515	1.1892	1.77819	1.11302	1.30969	1.30413	1.73536	1.27041	1.3294	1.2185	1.10771	1.15719	1.21257	1.21507	1.0519	0.908861	1.12197	1.44584	1.44705	1.08465
	5 µM	1.15956	1.74007	1.56051	1.30809	1.02862	0.976485	0.999586	1.04378	1.26256	1.29486	1.13977	1.31067	1.38448	1.25497	1.13607	1.58018	1.69542	1.25918	0.425515	1.03057	0.472397	0.952841	0.43298	1.21531	1.47521	1.23196	1.14724
	10 µM	1.65233	1.00974	1.16329	0.920474	0.882554	1.02745	0.942736	0.710929	0.909158	0.83952	1.21441	0.694749	1.10857	1.16742	0.996505	1.58815	0.548027	1.13603	0.44873	0.925201	0.406144	0.979164	0.53172	1.25003	1.1276	1.32967	1.02608
	33,3 µM	1.22976	1.07147	1.11365	1.04694	0.665472	0.617895	0.713142	0.686571	1.00825	0.878217	0.92274	1.36432	0.922154	1.31926	0.925273	1.39878	1.04111	1.42529	0.483844	0.911273	0.484997	0.867975	0.668259	1.26151	1.07557	1.2437	1.17029
	72h
	0 µM	2.43542	1.90637	2.80094	2.70484	2.0985	2.24506	2.08352	2.74567	2.65648	2.70102	2.80873	2.66329	1.12466	2.86835	1.92634	1.95476	2.73196	2.04306	0.541615	1.83062	2.22679	1.62511	1.28332	1.81382	2.21443	1.9872	1.26645
	3,33 µM	2.96332	2.69612	2.38666	2.5074	1.93252	1.60096	2.00628	2.37832	3.07661	2.94312	2.10566	2.94945	0.975898	2.29983	1.79969	2.70771	2.09967	2.28831	0.770279	2.7628	1.57224	1.14344	1.16665	2.3777	3.31345	1.76907	1.15933
	5 µM	2.81174	2.53	2.58476	2.809	2.04164	1.78505	1.65386	1.76316	2.45208	2.19681	2.55706	2.39018	1.04488	2.02254	2.34594	1.92481	2.93767	1.85249	0.941488	1.43911	1.62369	1.10136	1.22045	1.16578	2.69704	1.02494	1.04627
	10 µM	2.5539	2.53317	2.03143	2.29758	1.82302	2.19269	2.05138	0.861437	1.61178	2.00841	1.81492	2.33698	1.03223	2.43562	0.861001	1.64384	1.95954	0.842172	0.829361	1.61543	2.01307	0.760503	1.21195	0.795005	1.92511	0.586212	0.562283
	33,3 µM	2.44816	2.77041	1.7881	2.17789	1.98402	0.90351	2.14768	0.83327	1.92663	2.47901	1.96226	2.27646	0.414601	2.24131	0.392761	1.56889	1.97657	0.473707	0.710255	1.33517	1.29648	0.439498	0.985651	0.494599	2.10106	0.406186	0.380416

## Sheet:  Fig 1&2
PC3	ctrl	AC1	AC2	AC3	AC4	AC5	AC6	AC7	AC8	AC9	AC10	AC11	AC12	AC13	AC14	AC15	AC16	AC17	AC18	AC19	AC20	AC21	AC22	AC23	AC24	AC25	AC26
24h	1	1.57473	1.0089	1.10498	1.09609	1.25445	1.03559	1.21886	1.0516	1.12278	1.14591	1.24555	1.46619	1.07295	1.18861	1.18505	1.08897	1.12811	1.59253	1.38968	1.5694	1.17082	1.121	1.11922	1	1.07829	1.05872
	0.969751	1.68861	1.06406	1.10498	1.11388	1.27046	1.14947	1.26157	0.950178	1.34875	1.28114	1.16548	1.53025	1.25801	1.17438	1.12989	1.09964	1.08719	1.59964	1.3274	1.48577	1.18505	1.14769	1.16904	0.793594	1.10676	1.1032
	0.654804	0.845196	0.55516	0.681495	0.763345	0.976868	0.754448	1.03025	0.706406	1.04093	0.868327	0.75089	0.654804	0.587189	0.487544	0.489324	0.503559	0.560498	0.838078	0.574733	0.565836	0.405694	0.6121	0.953737	0.535587	0.637011	0.880783
	0.647687	0.991103	0.644128	0.927046	0.781139	0.925267	0.902135	0.871886	0.813167	1.01068	0.425267	0.903915	1.11566	0.848754	0.779359	0.631673	0.476868	0.537367	0.681495	0.505338	0.663701	0.451957	0.759786	0.875445	0.637011	0.683274	0.814947
	0.713946	0.532908	0.589621	0.755029	0.589621	0.685078	0.600697	0.551766	0.485963	0.453271	0.918277	0.893569	0.689081	0.740504	0.706719	0.699498	0.716357	0.55885	0.670684	0.635611	0.556488	0.704311	0.705114	0.582509	0.684277	0.802017	0.675479
	0.746149	0.470378	0.554127	0.623691	0.8542	0.785782	0.689882	0.769581	0.461819	0.672282	0.901797	0.813402	0.677877	0.676278	0.692285	0.646753	0.735668	0.780918	0.655519	0.514879	0.555701	0.704311	0.642772	0.74131	0.626074	0.734057	0.624485
48h	1.13879	1.72064	1.14413	1.18861	1.21352	1.33986	1.121	1.2669	1.24199	1.32918	1.29181	1.34164	1.56762	1.32918	1.24377	1.2847	1.07117	1.09786	1.77936	1.28826	1.66548	1.20641	1.11388	1.08363	1.14769	1.19573	1.08185
	0.733096	1.84698	1.18149	1.24377	1.29715	1.38968	1.1637	1.35587	1.20819	1.4484	1.17438	1.32562	1.70641	1.30961	1.29537	1.22776	1.25801	1.20107	1.67082	1.40391	1.70285	1.20641	1.12633	1.19573	1.14769	1.1548	1.19929
	2.1853	1.71622	1.87099	1.45174	1.51635	1.47557	0.659146	1.71805	1.46056	0.580006	0.559562	1.36672	1.14841	1.41043	1.01233	1.32065	1.61564	0.482986	0.631355	1.0524	0.945173	1.09689	1.24648	0.657555	0.427977	1.29124	1.11965
	1.70164	1.55913	1.84498	1.31632	1.01566	1.03317	0.544656	1.17642	0.542305	0.536823	2.04508	1.17727	1.61834	1.35452	1.09689	0.982408	1.28607	1.58958	1.25937	0.884329	0.984067	1.06999	0.546224	1.34582	0.46047	1.22506	1.62194
	1.76673	0.640613	1.31104	1.72173	1.87673	1.30083	1.30764	1.16103	1.28216	0.95595	1.26776	1.08214	1.00896	0.968151	0.937278	0.964082	1.08545	1.02781	0.864648	0.916226	0.929174	0.974666	0.947826	0.768063	0.999964	1.07058	1.00814
	1.18778	0.934846	1.45448	1.382	1.38028	1.02535	1.34174	0.991795	1.28046	0.933225	1.06316	0.951887	0.980371	1.09785	0.952699	0.980371	0.950262	1.01387	0.87188	0.957575	0.870272	1.07306	0.977926	1.17021	1.43197	1.14019	1.33746
72h	1.22776	1.92883	1.19217	1.1548	1.16192	1.57473	0.91637	1.06584	1.24021	1.40391	1.29893	1.27224	1.3363	1.7758	1.12456	1.20819	1.11388	1.2758	1.54626	1.3968	1.53737	1.13167	1.21708	1	1.18327	1.2242	1.14591
	1.18327	1.81673	1.20996	1.21708	1.22954	1.57295	1.04448	1.22242	1.21352	1.41459	1.36299	1.31851	1.25089	1.62456	1.16726	1.3879	1.07473	1.22242	0.784698	1.39858	1.49466	1.14057	1.15302	1.03915	1.16192	1.16726	1.2242
	3.62297	1.92343	2.62871	3.08779	2.79148	2.12008	2.76463	2.08035	2.02207	1.36269	2.29854	1.36355	1.10227	1.84524	1.40407	1.37129	2.49017	1.17495	1.08152	1.38594	0.959762	1.45786	1.63575	2.09452	2.4475	1.14061	1.47791
	3.3814	2.36483	3.01291	2.71018	2.47029	1.7651	2.06244	2.10871	1.96794	1.14061	1.9847	1.11642	1.08235	1.32152	1.29079	1.71904	2.05774	1.85439	0.910943	1.35152	1.22209	1.65001	1.54101	1.67952	3.3413	1.70734	0.728195
	6.52779	1.99427	1.61073	2.47499	2.21887	1.03955	2.78736	1.63031	0.95173	0.995106	0.885904	0.76228	1.15264	0.8657	0.728112	0.727319	0.900484	1.04699	1.34087	0.885095	0.720188	0.81903	0.7998	0.906972	0.990183	0.840721	0.949282
	3.94645	0.835896	1.01154	1.12004	1.20306	0.769451	1.2039	0.866508	1.25806	0.773437	1.17445	0.880242	0.892381	0.755912	0.750344	0.811012	0.979528	0.939497	0.77264	0.811012	0.759892	0.834288	0.84394	1.06353	1.62942	0.898052	0.971342
MCF7	ctrl	AC1	AC2	AC3	AC4	AC5	AC6	AC7	AC8	AC9	AC10	AC11	AC12	AC13	AC14	AC15	AC16	AC17	AC18	AC19	AC20	AC21	AC22	AC23	AC24	AC25	AC26
24h	1	1.07602	1.40093	1.14211	1.77533	1.83283	1.54086	1.64174	1.29751	1.02264	1.10415	0.9152	1.05848	1.03574	1.05585	0.786213	0.961819	1.00783	0.941067	0.992176	0.928123	1.10151	0.938476	0.931573	0.963551	1.02352	0.698528
	0.971348	1.01654	1.29932	1.27501	1.76578	1.04448	1.60611	0.970481	1.09975	1.06286	0.982623	0.893705	1.08216	0.994783	0.821889	0.93071	0.932435	1.00435	0.942794	0.945386	0.981755	0.998261	0.93071	1.03836	1.02177	1.0209	0.792148
	0.805731	1.1068	1.19537	1.10151	1.02875	1.33275	1.36995	0.977417	1.11737	0.983491	0.972215	0.890271	1.07514	1.05848	0.788756	0.91606	0.961819	1.01306	0.772662	0.852591	1.12708	0.900577	0.975683	1.03137	1.06724	1.01393	0.778588
	0.819988	0.971715	1.05215	0.990006	1.14757	1.5668	0.815718	0.80889	0.629979	1.24771	0.954333	1.37369	1.17606	0.892057	1.12982	0.844798	1.02496	1.14668	0.681063	1.46091	0.963019	0.844798	1.4646	0.944788	0.955201	0.920542	1.44247
	0.872261	0.717264	0.976066	1.41489	1.33542	0.843941	1.20912	0.836235	0.953465	1.21449	1.25941	1.12539	0.9119	1.17874	0.72993	0.867105	0.773137	0.853371	0.855086	1.06094	0.813157	1.22974	0.78759	0.863669	0.848226	1.00048	0.956938
	0.836235	1.29009	1.00746	1.49235	1.46922	0.906719	1.16982	1.41856	1.02321	1.42867	0.917948	0.816572	0.671828	1.0715	1.10061	0.78759	1.13869	1.28828	0.660927	1.28106	0.784187	1.06358	0.596651	0.850798	0.842228	1.4103	1.01708
48h	1.62412	1.20308	1.94799	1.30703	1.67581	1.89845	1.69753	1.405	1.69658	2.25262	1.26565	1.07846	1.23252	1.28362	1.54394	1.20843	1.37221	1.39405	1.14186	1.39405	0.972993	1.45166	1.2361	1.61382	1.43791	1.15336	0.717147
	1.30072	1.83189	2.00861	1.43425	1.94117	1.72878	1.42418	1.5802	1.54301	1.81845	1.22895	1.19863	1.3804	1.79738	1.34137	1.04519	1.17197	1.22716	1.089	1.20308	1.12773	1.15868	1.03472	1.04519	1.39314	1.48108	1.19151
	1.15956	1.87234	2.18618	1.49398	1.82613	1.78973	1.54023	1.71361	1.63819	1.32418	1.25848	1.19952	1.46544	1.29982	1.19952	1.24236	1.63068	1.39496	1.05044	1.02251	1.03384	1.04956	0.992938	1.13215	1.42144	0.760931	1.26027
	1.65233	1.0865	1.62969	1.05128	1.56682	1.88314	1.45263	1.16716	1.17965	0.858531	1.3409	0.635834	1.1734	1.20914	1.05216	1.24863	0.527103	1.25853	0.922285	0.917962	0.976951	1.07856	1.06535	1.16449	1.0865	1.36094	1.12718
	1.22976	1.15292	0.560152	1.19572	1.18143	1.1325	1.09886	1.12718	1.30821	0.898104	1.01885	1.24863	0.976081	1.36641	0.976951	1.09974	1.00136	1.57898	0.75533	0.904143	1.04514	0.956083	1.0768	1.17519	1.03636	1.27295	1.28559
	1.17519	0.822563	1.12452	1.11477	1.17786	1.11566	1.48959	1.10151	1.23065	1.02322	1.0066	0.89207	0.871414	0.993509	0.598323	0.849096	0.964772	1.07151	0.75533	1.08738	0.835391	1.35364	0.867118	1.06095	0.527103	1.03373	1.2181
72h	2.43542	2.05128	3.92392	3.08922	3.72552	4.11481	3.21042	4.5077	3.44682	2.76218	3.10126	2.43744	2.19043	2.97086	2.03393	1.53686	2.62765	2.26337	1.5097	1.8163	2.06674	1.79008	1.46103	1.68971	2.13371	2.03393	1.39123
	2.96332	2.90107	3.34355	2.86373	3.43085	2.93428	3.09141	3.90459	3.99194	3.00977	2.32497	2.69934	2.03297	2.38202	1.9002	2.12884	2.0195	2.53507	1.72488	2.74118	1.45923	1.25951	1.3282	2.215	3.19268	1.81067	1.27356
	2.81174	2.72232	3.62107	3.2082	3.62457	3.27168	2.54838	2.89466	3.18161	2.24656	2.82339	2.18749	1.80599	2.09482	2.47696	1.51331	2.82551	2.05225	1.886	1.42785	1.50698	1.21316	1.38945	1.68601	2.59873	1.74904	1.44935
	2.5539	2.72573	2.8459	2.6241	3.23646	4.01883	3.1609	1.41426	2.0913	2.05389	2.00395	2.1388	2.59259	2.52266	1.15909	1.29241	1.88473	1.93298	1.78048	1.60279	1.86838	1.8377	1.37978	1.2406	1.85495	1.6	1.61768
	2.44816	2.981	2.50501	2.4874	3.52229	1.65598	3.30928	1.36802	2.49982	2.53514	2.16663	2.08341	1.43885	2.3214	1.1847	1.23348	1.9011	2.26479	1.24684	1.32473	1.20329	1.68411	1.12214	1.14675	2.02448	1.31574	1.4079
	2.73319	3.04496	2.57793	2.62094	3.56461	0.889322	2.64939	1.58885	2.47809	2.0147	2.12294	2.31937	2.28193	1.76529	0.863758	1.25576	2.03035	2.21957	1.44067	1.48732	1.32023	1.55918	1.25665	1.16173	2.14178	1.47999	1.47999
0.698528	0.792148	0.778588	1.44247	0.956938	1.01708	0.717147	1.19151	1.26027	1.12718	1.28559	1.2181	1.39123	1.27356	1.44935	1.61768	1.4079	1.47999

## Sheet: Fig 3
PC3	24h				48h				72h
ctrl	1	0.93029	1.10451	1.05486	1.53849	1.6179	1.51783	1.53406	2.24839	2.72569	2.45901	2.84826
AC1	1	0.928647	0.978561	0.933885	1.29545	1.50404	1.46434	1.37828	2.47054	2.23196	2.09651	1.99383
AC18	1	0.97562	0.976935	1.06304	1.29029	1.13548	1.15852	1.34586	1.23227	1.20816	1.02643	1.42861
AC20	1	0.882742	1.10704	1.03894	1.3207	1.29613	1.40401	1.43619	2.15965	1.85888	2.1889	2.00317
AC22	1	0.892848	0.8446	0.950273	1.27326	1.38142	1.45308	1.26313	1.5365	1.7618	1.58255	1.44935
Rosigl	1	1.13137	1.06739	0.990533	1.50346	1.47057	1.44788	1.49079	1.94621	1.65512	2.26965	2.38305
MCF7	24h				48h				72h
ctrl	1	0.904454	0.741726	0.620528	0.920492	1.20471	1.04738	0.887875	1.36936	1.51952	1.24631	1.66581
AC1	1	1.72319	1	1.26855	1.89335	1.554	1.44326	1.33837	2.11708	1.97377	2.32997	2.18271
AC18	1	1.49043	1.13533	1.06183	1.05675	1.37999	1.73727	1.37714	1.57008	1.40742	1.51107	1.96231
AC20	1	1.14382	1.05886	0.97782	0.923557	0.774045	1.90311	1.00902	1.52574	1.21658	1.71423	1.32444
AC22	1	0.964944	0.798386	0.814645	0.696473	0.631351	1.26405	1.02444	1.21653	0.989375	1.12963	1.21489
Rosigl	1	0.874843	1.16506	0.996557	0.956852	0.870809	0.944224	1.94627	1.2595	1.65129	1.23775	1.70857

## Sheet: Wound Healing
PC3	crtl				ac1				ac18				ac20				ac22				Rosigl
4h	49.0688	58.8984	49.0688	69.6188	41.4742	24.4241	56.8961	54.789	18.1051	23.9519	19.48	16.8866	39.4029	22.6564	28.1159	22.6564	32.9697	27.5575	39.2625	32.9697	27.1847	28.7037	25.8984	27.998
8h	95.4066	61.036	95.4066	97.2709	55.3069	46.7437	80.4536	81.0302	45.9803	44.9313	56.998	49.7107	57.6522	64.808	57.7037	64.808	56.2386	37.8673	81.381	56.2386	52.9029	55.1159	54.8673	56.48
12h	100	76.4104	100	100	100	54.5316	93.6893	98.495	70.5323	63.3125	78.4822	72.1319	74.8189	85.7119	89.6095	85.7119	69.0882	61.6727	95.7421	69.0882	80.7566	82.6564	83.3125	78.5575
MCF7	crtl				ac1				ac18				ac20				ac22				Rosigl
4h	9.34798	2.70513	8.43757	2.6174	9.03834	13.6734	1.36028	4.23555	0.213208	0.49127	0.220107	0.49127	1.05037	0.0552401	0.0552401	0.209796	4.46214	4.32863	2.76151	1.46336	1.05037	0.0552401	0.49127	0.209796
8h	27.9373	14.1017	15.4275	16.6529	15.916	31.1934	5.86401	9.67897	3.28302	4.70128	0.462384	4.70128	3.9377	8.82615	8.82615	4.40225	4.6692	4.58142	6.69568	6.64559	3.9377	8.82615	8.67897	6.40225
12h	39.1848	20.1105	30.2428	32.5986	30.4017	55.5314	32.0829	30.6581	9.1717	11.6505	12.8074	11.6505	20.797	17.4068	17.4068	16.2046	7.80423	9.15955	16.2613	14.7756	26.797	23.4068	20.4068	21.2046

## Sheet: Western Blot
																			Fig. 4B						Fig. 4A
